# Supplementary material
Source: PubMed Central journal article supplement (PMC2744790)
Supplement: 125_2009_1391_MOESM1_ESM.pdf [file 125_2009_1391_MOESM1_ESM.pdf]

## Electronic supplementary material

**ESM Table 1** Summary of published type 2 diabetes association studies

| Gene region          | Chromosome<br>no. | SNP              | Cases  | Controls | OR <sup>a</sup> | <i>p</i> value        | Ref. <sup>b</sup> |
|----------------------|-------------------|------------------|--------|----------|-----------------|-----------------------|-------------------|
| <i>TCF7L2</i>        | 10                | rs7903146 (C>T)  | 14,586 | 17,968   | 1.37            | 1.0×10 <sup>-48</sup> | [8, 15]           |
|                      | 10                | rs12255372 (G>T) | 1,774  | 2,000    | 1.52            | 2.5×10 <sup>-16</sup> | [9]               |
| <i>CDKN2A–CDKN2B</i> | 9                 | rs10811661 (T>C) | 14,586 | 17,968   | 0.83            | 7.8×10 <sup>-15</sup> | [4, 8, 15]        |
| <i>FTO</i>           | 16                | rs8050136 (C>A)  | 14,586 | 17,968   | 1.17            | 1.3×10 <sup>-12</sup> | [8, 4]            |
| <i>KCNJ11</i>        | 11                | rs5219 (C>T)     | 14,586 | 17,968   | 1.14            | 6.7×10 <sup>-11</sup> | [8, 15]           |
| <i>HHEX–IDE</i>      | 10                | rs1111875 (G>A)  | 14,586 | 17,968   | 0.88            | 5.7×10 <sup>-10</sup> | [4, 8, 15]        |
| <i>IGF2BP2</i>       | 3                 | rs4402960 (G>T)  | 14,586 | 17,968   | 1.14            | 8.9×10 <sup>-16</sup> | [4, 8, 15]        |
| <i>CDKAL1</i>        | 6                 | rs7756992 (A>G)  | 3,836  | 12,562   | 1.20            | 7.7×10 <sup>-9</sup>  | [11]              |
| <i>SLC30A8</i>       | 8                 | rs13266634 (C>T) | 14,586 | 17,968   | 0.89            | 5.3×10 <sup>-8</sup>  | [4, 8, 15]        |
| <i>WFS1</i>          | 4                 | rs10010131 (G>A) | 9,533  | 11,389   | 0.90            | 1.4×10 <sup>-7</sup>  | [12]              |
| <i>HNF1B</i>         | 17                | rs7501939 (C>T)  | 9,936  | 23,087   | 1.10            | 9.2×10 <sup>-7</sup>  | [13]              |
| <i>PPARG</i>         | 3                 | rs1801282 (C>G)  | 14,586 | 17,968   | 0.88            | 1.7×10 <sup>-6</sup>  | [4, 8, 15]        |

<sup>a</sup>ORs are for the minor allele using the common allele as the reference allele

<sup>b</sup>The publication that reported these ORs and *p* values for association with type 2 diabetes
