# Supplementary material
Source: PubMed Central journal article supplement (PMC2744790)
Supplement: 125_2009_1391_MOESM2_ESM.pdf [file 125_2009_1391_MOESM2_ESM.pdf]

ESM Table 2 Association analysis of recently reported type 2 diabetes loci with type 1 diabetes

| Gene region          | SNP              | $r^2$ | Type 2 diabetes <sup>a</sup> |      |      | Type 1 diabetes meta-analysis <sup>b</sup> |          |                  |                       |          |
|----------------------|------------------|-------|------------------------------|------|------|--------------------------------------------|----------|------------------|-----------------------|----------|
|                      |                  |       | MAF                          | OR   | Ref. | Cases                                      | Controls | OR (95% CI)      | $p$ value             | Power, % |
| <i>JAZF1</i>         | rs864745 (T>C)   |       | 0.50                         | 0.91 | [1]  | 3,562                                      | 4,650    | 1.00 (0.94–1.06) | 0.943                 | 53       |
| <i>CDC123–CAMKID</i> | rs12779790 (A>G) |       | 0.18                         | 1.11 | [1]  | –                                          | –        | –                | –                     |          |
|                      | rs4747969 (T>C)  | 0.83  | –                            | –    | –    | 3,560                                      | 4,641    | 0.99 (0.91–1.08) | 0.834                 | 34       |
| <i>TSPAN8–LGR5</i>   | rs7961581 (T>C)  |       | 0.27                         | 1.09 | [1]  | 3,555                                      | 4,647    | 1.04 (0.97–1.12) | 0.273                 | 30       |
| <i>THADA</i>         | rs7578597 (T>C)  |       | 0.10                         | 0.87 | [1]  | –                                          | –        | –                | –                     |          |
|                      | rs17031005 (A>G) | 1.0   | –                            | –    | –    | 3,564                                      | 4,655    | 0.81 (0.73–0.89) | 4.79x10 <sup>-5</sup> | 35       |
| <i>ADAMTS9</i>       | rs4607103 (C>T)  |       | 0.24                         | 0.92 | [1]  | 3,563                                      | 4,651    | 0.99 (0.92–1.07) | 0.858                 | 25       |
| <i>NOTCH2</i>        | rs10923931 (G>T) |       | 0.11                         | 1.13 | [1]  | –                                          | –        | –                | –                     |          |
|                      | rs2793831 (T>C)  | 1.0   | –                            | –    | –    | 3,557                                      | 4,649    | 1.03 (0.93–1.13) | 0.620                 | 30       |
| <i>PPARG</i>         | rs1801282 (C>G)  |       | 0.18                         | 0.88 | [2]  | 3,563                                      | 4,651    | 0.97 (0.88–1.07) | 0.523                 | 56       |
| <i>CDKN2A–CDKN2B</i> | rs10811661 (T>C) |       | 0.15                         | 0.83 | [2]  | 3,565                                      | 4,656    | 1.06 (0.97–1.15) | 0.213                 | 85       |
| <i>FTO</i>           | rs9939609 (T>A)  |       | 0.40                         | 1.15 | [3]  | 3,564                                      | 4,657    | 0.97 (0.91–1.03) | 0.291                 | 91       |

<sup>a</sup>Results are taken from the listed publications for type 2 diabetes associations and the MAF from their control group. The ORs are for the minor allele

<sup>b</sup>Results from the meta-analysis reported by Cooper et al. [4], who used a genotype call rate  $\geq 99\%$ , a subject call rate  $\geq 95\%$  and a MAF  $\geq 0.05$  as quality control measures. They calculated  $p$  values using a Wald test. The SNPs with the most convincing evidence of association with type 2 diabetes in three gene regions were not included in the study by Cooper et al. However, tags SNPs (SNPs in high linkage disequilibrium with these SNPs) were included: SNPs rs4747969, rs17031005, and rs2793831 were used as tags for rs12779790, rs7578597, and rs10923931, respectively. Power was calculated for the number of cases and controls included in the Cooper et al. type 1 diabetes meta-analysis [4] for the given MAF and effect size in type 2 diabetes, at an  $\alpha$  level of 0.003. The power loss as a result of combining the data sets into a meta-analysis was minimal (0.679%)

## References

1. Zeggini E, Scott LJ, Saxena R, et al. (2008) Meta-analysis of genome-wide association data and large-scale replication identifies additional susceptibility loci for type 2 diabetes. *Nat Genet* 40:638–645
2. Scott LJ, Mohlke KL, Bonnycastle LL, et al. (2007) A genome-wide association study of type 2 diabetes in Finns detects multiple susceptibility variants. *Science* 316:1341–1345
3. Frayling TM, Timpson NJ, Weedon MN, et al. (2007) A common variant in the *FTO* gene is associated with body mass index and predisposes to childhood and adult obesity. *Science* 316:889–894
4. Cooper JD, Smyth DJ, Smiles AM et al. (2008) Meta-analysis of genome-wide association study data identifies additional type 1 diabetes risk loci. *Nat Genet* 40:1399–1401
