# Supplementary material
Source: PubMed Central journal article supplement (PMC2744790)
Supplement: 125_2009_1391_MOESM3_ESM.pdf [file 125_2009_1391_MOESM3_ESM.pdf]

## Electronic supplementary material

**ESM Table 3** Number of samples common to the current and previously published type 1 diabetes studies

| Gene region   | SNP              | Previously published samples | Ref. of previous publication | Current study | Common |
|---------------|------------------|------------------------------|------------------------------|---------------|--------|
| <i>TCF7L2</i> | rs7903146 (C>T)  | 13,167                       | [18]                         | 13,218        | 13,093 |
|               | rs12255372 (G>T) | 13,339                       | [18]                         | 16,623        | 13,260 |
| <i>FTO</i>    | rs9939609 (T>A)  | 14,803                       | [19]                         | 14,837        | 14,620 |
| <i>PPARG</i>  | rs1801282 (C>G)  | 2,355                        | [17]                         | 3,312         | 2,177  |

For *TCF7L1* and *FTO*, the number indicates the total number of cases and controls. For *PPARG*, the number corresponds to the number of families that were common to both studies. The discrepancy in counts is due to extra genotyping, some participants having changed ethnic status (some samples were mis-recorded originally as being from white [Caucasian] individuals when they were not), some participants having had their disease status changed from type 1 diabetes to type 2 diabetes, and the discovery after the genome-wide association studies that some samples had been aliquoted twice
