# Supplementary material
Source: PubMed Central journal article supplement (PMC2744790)
Supplement: 125_2009_1391_MOESM5_ESM.pdf [file 125_2009_1391_MOESM5_ESM.pdf]

## Electronic supplementary material

**ESM Table 5** Interaction of 12 type 2 diabetes-associated loci with HLA class II genotypes in up to 8,419 type 1 diabetes cases

| Gene region          | SNP              | <i>p</i> value for interaction of SNP with HLA class II genotypes |                     |                     |
|----------------------|------------------|-------------------------------------------------------------------|---------------------|---------------------|
|                      |                  | DR3/4/X coding                                                    | rs7454108 (HLA-DR4) | rs2187668 (HLA-DR3) |
| <i>TCF7L2</i>        | rs12255372 (G>T) | 0.225                                                             | 0.049               | 0.568               |
|                      | rs7903146 (C>T)  | 0.528                                                             | 0.395               | 0.441               |
| <i>CDKN2A–CDKN2B</i> | rs10811661 (T>C) | 0.326                                                             | 0.129               | 0.142               |
| <i>FTO</i>           | rs9939609 (T>A)  | 0.544                                                             | 0.543               | 0.115               |
| <i>KCNJ11</i>        | rs5219 (C>T)     | 0.444                                                             | 0.477               | 0.966               |
| <i>HHEX–IDE</i>      | rs1111875 (G>A)  | 0.228                                                             | 0.311               | 0.147               |
| <i>IGF2BP2</i>       | rs4402960 (G>T)  | 0.209                                                             | 0.812               | 0.399               |
| <i>CDKAL1</i>        | rs7756992 (A>G)  | 0.049                                                             | 0.020               | 0.230               |
| <i>SLC30A8</i>       | rs13266634 (C>T) | 0.307                                                             | 0.341               | 0.028               |
| <i>WFS1</i>          | rs10010131 (G>A) | 0.406                                                             | 0.098               | 0.616               |
| <i>HNF1B</i>         | rs7501939 (C>T)  | 0.694                                                             | 0.966               | 0.336               |
| <i>PPARG</i>         | rs1801282(C>G)   | 0.459                                                             | 0.086               | 0.334               |
| <i>THADA</i>         | rs7578597 (T>C)  | 0.733                                                             | 0.661               | 0.339               |
|                      | rs17031005 (A>G) | 0.619                                                             | 0.448               | 0.334               |
