# Supplementary material
Source: PubMed Central journal article supplement (PMC2744790)
Supplement: 125_2009_1391_MOESM6_ESM.pdf [file 125_2009_1391_MOESM6_ESM.pdf]

**Electronic supplementary material**

**ESM Table 6** Interaction of the 12 type 2 diabetes loci with age at diagnosis in up to 8,225 cases

| Gene region               | SNP              | Allele frequencies for each quartile divided by age at |              |              |              | <i>p</i> value     |
|---------------------------|------------------|--------------------------------------------------------|--------------|--------------|--------------|--------------------|
|                           |                  | diagnosis                                              |              |              |              |                    |
|                           |                  | 0–4 years                                              | 5–7 years    | 8–10 years   | 11–16 years  |                    |
| <i>TCF7L2</i>             | rs12255372 (G>T) | 2,040 (0.26)                                           | 1,731 (0.22) | 1,817 (0.23) | 2,175 (0.28) | 0.200              |
|                           | rs7903146 (C>T)  | 1,612 (0.27)                                           | 1,320 (0.22) | 1,357 (0.23) | 1,593 (0.27) | 0.042              |
| <i>CDKN2A–<br/>CDKN2B</i> | rs10811661 (T>C) | 2,017(0.26)                                            | 1,671 (0.22) | 1,788 (0.23) | 2,157 (0.28) | 0.008 <sup>a</sup> |
| <i>FTO</i>                | rs9939609 (T>A)  | 2,010 (0.26)                                           | 1,687 (0.22) | 1,792 (0.23) | 2,165 (0.28) | 0.936              |
| <i>KCNJ11</i>             | rs5219 (C>T)     | 2,081 (0.26)                                           | 1,753 (0.22) | 1,851 (0.23) | 2,360 (0.29) | 0.901              |
| <i>HHEX–IDE</i>           | rs1111875 (G>A)  | 2,052 (0.26)                                           | 1,708 (0.21) | 1,845 (0.23) | 2,362 (0.30) | 0.512              |
| <i>IGF2BP2</i>            | rs4402960 (G>T)  | 1,988 (0.26)                                           | 1,660 (0.22) | 1,757 (0.23) | 2,148 (0.28) | 0.860              |
| <i>CDKAL1</i>             | rs7756992 (A>G)  | 2,027 (0.26)                                           | 1,698 (0.22) | 1,800 (0.23) | 2,188 (0.28) | 0.854              |
| <i>SLC30A8</i>            | rs13266634 (C>T) | 2,022 (0.26)                                           | 1,690 (0.22) | 1,789 (0.23) | 2,178 (0.28) | 0.507              |
| <i>WFS1</i>               | rs10010131 (G>A) | 1,987 (0.26)                                           | 1,674 (0.22) | 1,789 (0.23) | 2,294 (0.30) | 0.724              |
| <i>HNF1B</i>              | rs7501939 (C>T)  | 2,031 (0.26)                                           | 1,697 (0.22) | 1,795 (0.23) | 2,188 (0.28) | 0.122              |
| <i>PPARG</i>              | rs1801282(C>G)   | 2,121 (0.26)                                           | 1,780 (0.22) | 1,896 (0.23) | 2,418 (0.29) | 0.140              |
| <i>THADA</i>              | rs7578597 (T>C)  | 1,988 (0.26)                                           | 1,655 (0.22) | 1,764 (0.23) | 2,193 (0.29) | 0.903              |
|                           | rs17031005(A>G)  | 1,892 (0.26)                                           | 1,594 (0.22) | 1,679 (0.23) | 2,090 (0.29) | 0.934              |

<sup>a</sup>This did not reach our significance threshold of 0.003
